# Supplementary material for: Green Tea Quality Evaluation Based on Its Catechins and Metals Composition in Combination with Chemometric Analysis
Source: PubMed Central journal article supplement (PMC6100455; doi:10.3390/molecules23071689), 2018-07-11

## SUPPLEMENTARY MATERIAL

### Green tea quality evaluation based on its catechins and metals composition in combination with chemometric analysis

Wojciech Koch, Wirginia Kukula-Koch, Łukasz Komsta, Zbigniew Marzec, Wojciech Szwerc and Kazimierz Głowniak

**Table S1.** Accurate mass measurements and identification data of catechins in the studied samples.

| <i>No</i> | <i>Ion (+/-)</i> | <i>Rt (min)</i> | <i>Molecular formula</i>                        | <i>m/z experimental</i> | <i>m/z calculated</i> | <i>Delta (ppm)</i> | <i>DBE</i> | <i>MS/MS fragments</i> | <i>Proposed compound</i>        |
|-----------|------------------|-----------------|-------------------------------------------------|-------------------------|-----------------------|--------------------|------------|------------------------|---------------------------------|
| 1         | (-)              | 12.6            | C <sub>15</sub> H <sub>14</sub> O <sub>6</sub>  | 289.0717                | 289.0718              | 0.21               | 9.0        | 245, 203, 165          | <b>Catechin</b>                 |
| 2         | (-)              | 11.4            | C <sub>15</sub> H <sub>14</sub> O <sub>6</sub>  | 289.0721                | 289.0718              | -1.17              | 9.0        | 245, 203, 163          | <b>Epicatechin</b>              |
| 3         | (-)              | 10.2            | C <sub>15</sub> H <sub>14</sub> O <sub>7</sub>  | 305.0671                | 305.0667              | -1.38              | 9.0        | 261, 219, 179, 167     | <b>Epigallocatechin</b>         |
| 4         | (-)              | 14.2            | C <sub>22</sub> H <sub>18</sub> O <sub>11</sub> | 457.0790                | 457.0776              | -2.98              | 14.0       | 305, 169               | <b>Epigallocatechin gallate</b> |
| 5         | (-)              | 15.1            | C <sub>22</sub> H <sub>18</sub> O <sub>10</sub> | 441.0841                | 441.0827              | -3.12              | 14.0       | 289, 169               | <b>Epicatechin gallate</b>      |
| 6         | (-)              | 3.2             | C <sub>9</sub> H <sub>8</sub> O <sub>4</sub>    | 169.0150                | 169.0142              | -4.43              | 5.0        | 125, 97                | <b>Gallic acid</b>              |

**Figure S1.** Fragmentation spectra of all identified catechins and gallic acid obtained at the collision energy of 20V in the negative ionization mode.

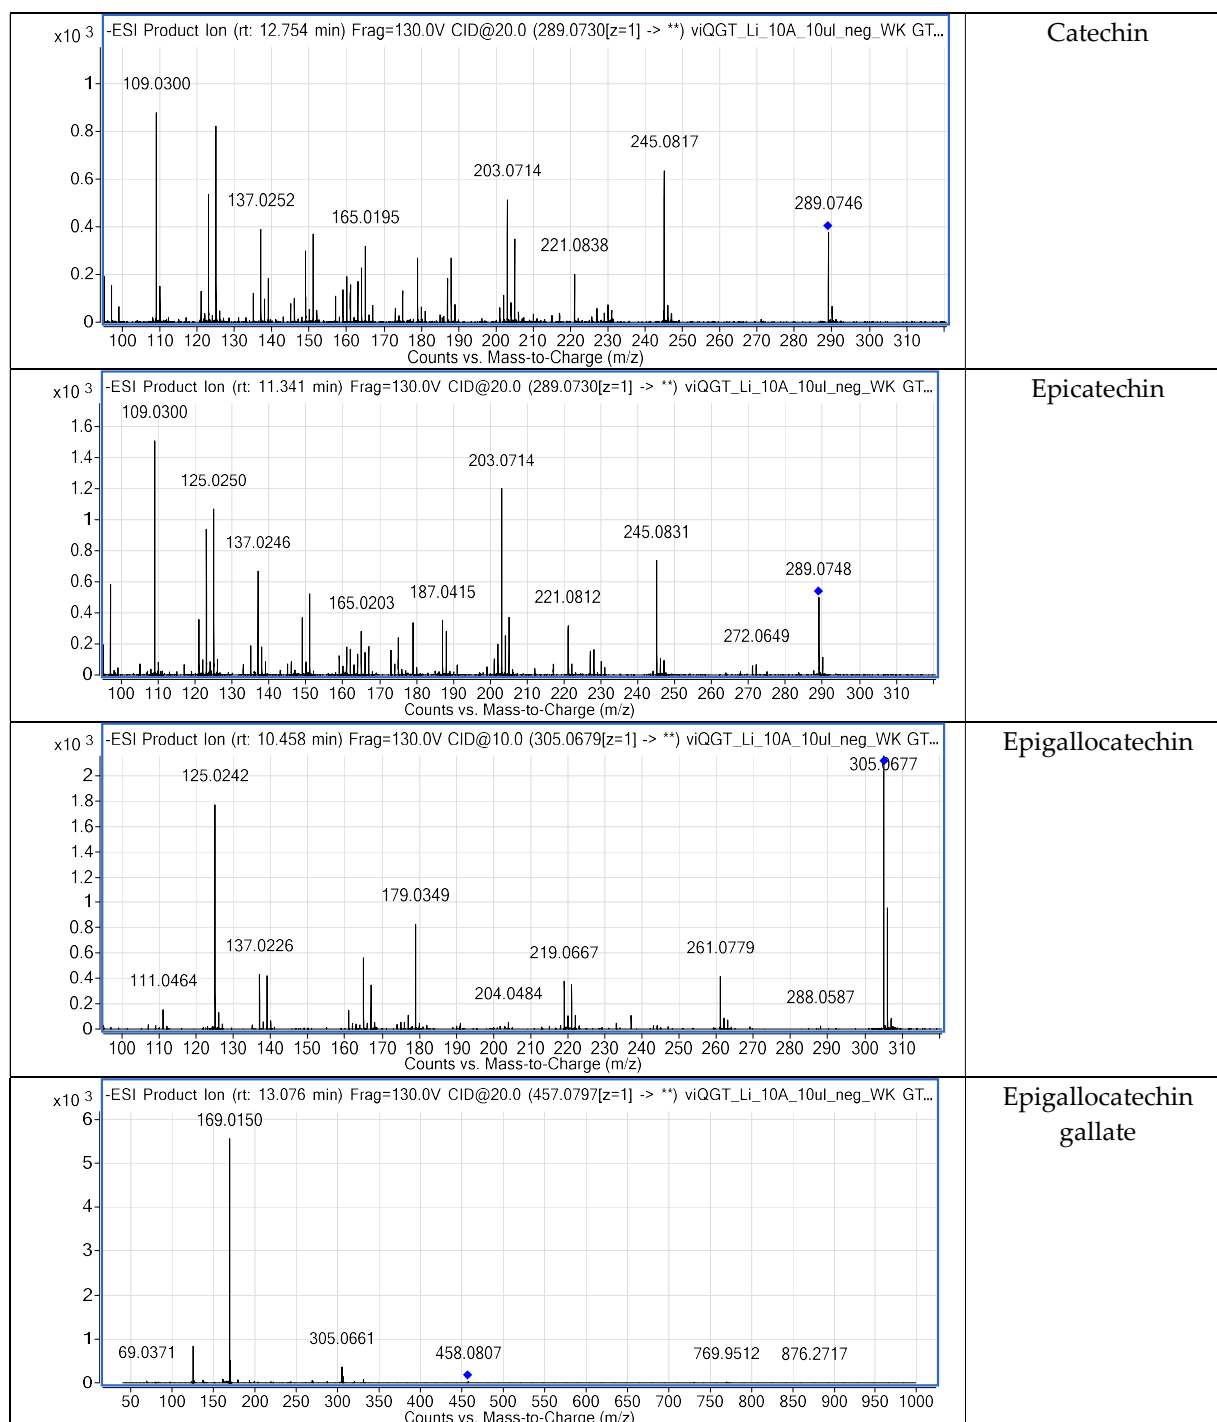

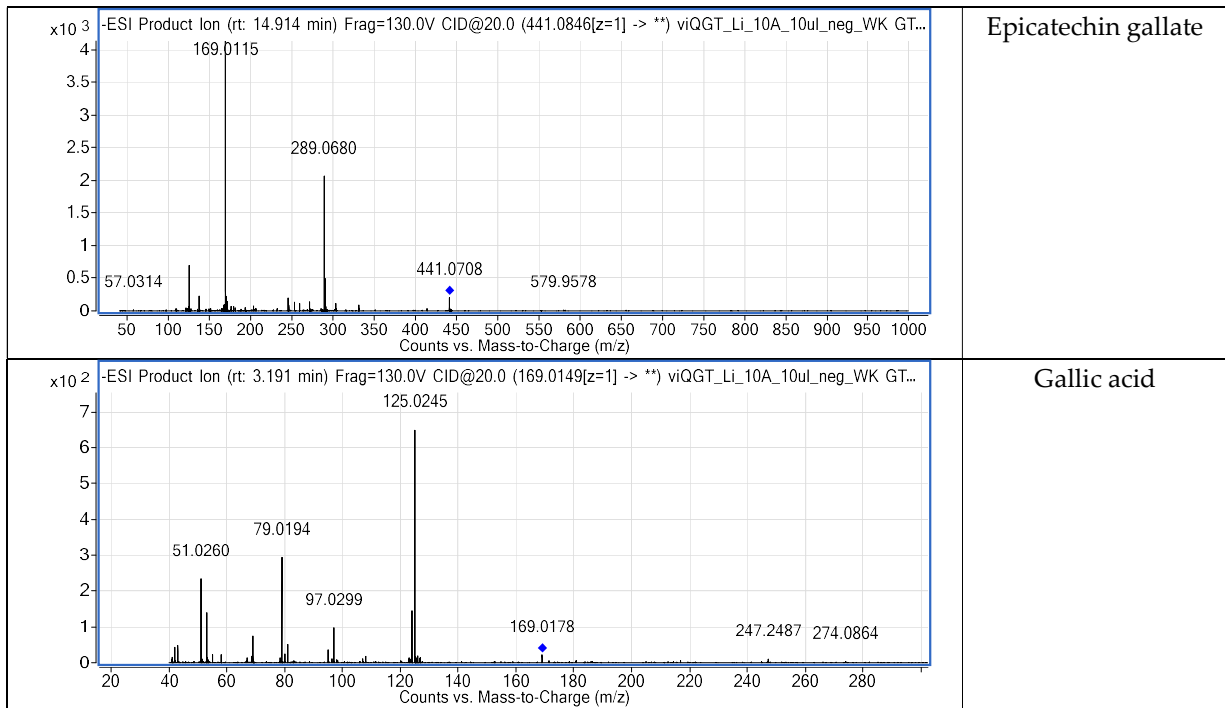

## PCA Summary and Scores

**Dataset S1.** The raw data obtained from Principal Components Analysis.

*Table continues below*

|                               | PC1    | PC2    | PC3    | PC4     | PC5     |
|-------------------------------|--------|--------|--------|---------|---------|
| <b>Standard deviation</b>     | 2.662  | 2.22   | 1.566  | 1.346   | 1.168   |
| <b>Proportion of Variance</b> | 0.3374 | 0.2348 | 0.1167 | 0.08627 | 0.06498 |
| <b>Cumulative Proportion</b>  | 0.3374 | 0.5722 | 0.6889 | 0.7752  | 0.8401  |

*Table continues below*

|                               | PC6     | PC7     | PC8     | PC9     | PC10    |
|-------------------------------|---------|---------|---------|---------|---------|
| <b>Standard deviation</b>     | 0.9327  | 0.8342  | 0.6271  | 0.6098  | 0.5015  |
| <b>Proportion of Variance</b> | 0.04142 | 0.03314 | 0.01873 | 0.01771 | 0.01198 |
| <b>Cumulative Proportion</b>  | 0.8816  | 0.9147  | 0.9334  | 0.9511  | 0.9631  |

*Table continues below*

|                               | PC11    | PC12    | PC13    | PC14    | PC15    |
|-------------------------------|---------|---------|---------|---------|---------|
| <b>Standard deviation</b>     | 0.4155  | 0.3822  | 0.3613  | 0.268   | 0.2565  |
| <b>Proportion of Variance</b> | 0.00822 | 0.00696 | 0.00622 | 0.00342 | 0.00313 |

|                               |         |         |         |         |         |
|-------------------------------|---------|---------|---------|---------|---------|
| <b>Cumulative Proportion</b>  | 0.9713  | 0.9783  | 0.9845  | 0.9879  | 0.991   |
| <i>Table continues below</i>  |         |         |         |         |         |
|                               | PC16    | PC17    | PC18    | PC19    | PC20    |
| <b>Standard deviation</b>     | 0.2399  | 0.211   | 0.1876  | 0.1622  | 0.1262  |
| <b>Proportion of Variance</b> | 0.00274 | 0.00212 | 0.00168 | 0.00125 | 0.00076 |
| <b>Cumulative Proportion</b>  | 0.9938  | 0.9959  | 0.9976  | 0.9988  | 0.9996  |
|                               | PC21    |         |         |         |         |
| <b>Standard deviation</b>     | 0.09146 |         |         |         |         |
| <b>Proportion of Variance</b> | 4e-04   |         |         |         |         |
| <b>Cumulative Proportion</b>  | 1       |         |         |         |         |

*Table continues below*

| PC1     | PC2     | PC3     | PC4      | PC5      | PC6      | PC7       |
|---------|---------|---------|----------|----------|----------|-----------|
| -1.208  | 3.567   | -0.4406 | 2.068    | 2.159    | 0.8809   | -0.005901 |
| -1.426  | 3.481   | 0.1338  | 1.997    | 0.7142   | 2.46     | 0.4478    |
| -1.454  | 3.473   | 0.2349  | 1.572    | 1.61     | 1.068    | -0.423    |
| -1.116  | 3.285   | -0.7634 | 1.497    | 2.767    | 0.5978   | -0.3718   |
| -1.419  | 3.058   | -0.1135 | 1.895    | 1.734    | 0.5771   | -0.7232   |
| -1.399  | 3.517   | -0.7839 | 1.176    | 0.6647   | 1.292    | -0.05869  |
| -1.395  | 3.803   | -0.4604 | 1.329    | 0.7515   | 1.074    | -0.04702  |
| -1.198  | 3.474   | 0.1575  | 1.453    | 2.509    | 0.5237   | 0.03556   |
| -1.585  | 3.205   | -0.4896 | 1.49     | 0.4394   | 1.87     | -0.0455   |
| 4.961   | -1.108  | -1.503  | 0.7523   | -0.2467  | 0.4477   | 0.6496    |
| 5.818   | -0.2463 | -1.157  | 1.018    | 0.5381   | -0.8099  | 0.2163    |
| 4.816   | -0.9127 | -1.696  | 0.2342   | 0.2332   | -0.4638  | -0.1152   |
| 4.415   | -0.2519 | -0.8184 | -0.1008  | -0.1015  | -0.3296  | 0.4588    |
| 5.126   | -0.3736 | -0.7052 | 0.7357   | -0.01584 | -1.024   | -0.155    |
| 5.669   | -0.6722 | -1.135  | 0.9683   | -0.1955  | -0.2981  | 0.3957    |
| 5.089   | -1.099  | -1.416  | 0.882    | 0.006128 | 0.3551   | 0.04222   |
| 5.261   | -0.334  | -1.648  | 0.36     | 0.03929  | -0.3362  | 0.6179    |
| 5.103   | -0.3943 | -0.9838 | 0.5279   | 0.001402 | -0.3324  | 0.8439    |
| 4.036   | 0.06305 | -0.7865 | -0.3261  | 0.1085   | 0.06531  | -0.08024  |
| 3.383   | -0.182  | -1.348  | -0.08731 | -0.3863  | 0.2882   | -0.5469   |
| 4.149   | 0.3915  | -0.3539 | -0.483   | 0.2489   | -0.7719  | -0.5958   |
| 2.917   | 0.6833  | -1.487  | -1.187   | -0.9864  | 1.174    | -0.04531  |
| 3.615   | 0.3662  | -1.364  | -0.8602  | -0.7114  | 0.3999   | -0.3125   |
| 3.931   | 0.1429  | -1.518  | -0.8177  | -0.6489  | 0.7844   | 0.2089    |
| 3.729   | 0.2901  | -0.7839 | -0.305   | 0.00723  | -0.06093 | -0.2312   |
| 4.211   | 0.1179  | -0.6834 | -0.2574  | 0.5185   | -0.399   | -0.01262  |
| 3.65    | 0.1876  | -1.336  | -0.3645  | -0.1508  | 0.6011   | -0.61     |
| -0.7981 | 3.742   | 0.3759  | 0.2708   | -0.1586  | -1.027   | -0.7379   |
| -0.4644 | 3.646   | 0.89    | -0.3103  | -0.5916  | -1.226   | 0.4747    |
| -0.6029 | 3.58    | 1.317   | -0.01376 | -3.61    | -0.5962  | 0.09034   |
| -0.9018 | 3.375   | 1.569   | 0.35     | -3.422   | -0.3616  | 0.5507    |
| -1.169  | 3.083   | 0.972   | 0.5147   | -2.894   | -0.3146  | -0.2675   |
| -0.7759 | 2.769   | 0.7461  | -0.2029  | -3.312   | 0.5706   | -0.1031   |

|         |         |         |          |           |          |          |
|---------|---------|---------|----------|-----------|----------|----------|
| -0.7349 | 3.994   | 0.6206  | 1.098    | -1.694    | -0.1683  | -0.4787  |
| -0.469  | 3.535   | 1.092   | 0.6531   | -2.29     | -0.459   | -0.08084 |
| -0.726  | 2.939   | 0.7558  | -0.4746  | -1.876    | -1.634   | -0.3121  |
| -1.207  | 1.376   | -0.0236 | -2.089   | 1.926     | 0.1665   | 1.686    |
| -1.728  | 1.23    | 0.09168 | -2.068   | 1.046     | -0.8748  | 0.9329   |
| -1.805  | 1.95    | -0.7711 | -2.597   | 0.692     | -0.7782  | 0.3566   |
| -1.331  | 1.459   | 0.03994 | -3.28    | 0.6333    | -0.5535  | 1.371    |
| -0.981  | 0.9928  | -0.2932 | -2.727   | 0.2625    | -0.3084  | 0.9029   |
| -1.528  | 1.292   | -0.157  | -2.448   | 1.483     | -1.524   | 0.6542   |
| -1.61   | 0.9778  | -0.6302 | -2.258   | 1.812     | -1.326   | 0.1352   |
| -1.742  | 2.208   | 0.2927  | -2.077   | 0.1821    | 0.517    | 1.669    |
| -1.533  | 1.582   | 0.1207  | -2.651   | 1.163     | -1.516   | 0.6348   |
| -2.639  | -2.304  | 0.1249  | 2.429    | 0.63      | -1.639   | 1.015    |
| -2.459  | -2.809  | -1.111  | 1.54     | 0.1797    | -1.071   | 0.5001   |
| -2.573  | -2.672  | -0.6589 | 1.889    | -0.8579   | -0.03674 | 1.632    |
| -2.834  | -3.226  | -0.4423 | 1.85     | -1.452    | -0.2199  | 1.471    |
| -2.926  | -2.215  | -0.1052 | 2.372    | -0.02292  | -0.8741  | 0.7179   |
| -2.443  | -2.245  | -0.641  | 2.525    | 0.3634    | -0.8641  | 1.159    |
| -2.378  | -2.667  | -0.2378 | 1.622    | -0.7938   | -0.3073  | 1.535    |
| -2.452  | -2.529  | -0.5951 | 1.885    | 0.03575   | -1.049   | 1.233    |
| -2.842  | -2.998  | -0.8999 | 2.381    | 0.0174    | -1.06    | 0.2374   |
| -1.7    | -1.956  | -0.6263 | 0.07483  | -0.2251   | -0.03504 | -1.774   |
| -1.555  | -0.1897 | -0.2766 | -0.1955  | 0.8031    | -1.589   | -1.632   |
| -1.94   | -1.584  | -0.7439 | -0.07026 | -0.7471   | 0.5417   | -1.718   |
| -1.939  | -1.05   | -0.6401 | -0.5017  | -0.02944  | -0.5549  | -1.273   |
| -1.978  | -1.045  | -0.4493 | 0.1572   | 0.4665    | -1.354   | -1.942   |
| -1.654  | -1.363  | -0.6936 | -0.1993  | 0.4713    | -0.7208  | -1.505   |
| -1.561  | -1.46   | -0.5613 | -0.3783  | -0.4091   | 0.1367   | -1.349   |
| -1.918  | -1.247  | -0.6493 | 0.1739   | -0.2501   | 0.1167   | -1.648   |
| -2.08   | -0.6508 | -0.3124 | -0.4138  | -0.008613 | -1.322   | -1.644   |
| 1.449   | -1.539  | 3.831   | -0.03676 | 0.6951    | -0.08344 | -0.03675 |
| 1.585   | -2.116  | 4.036   | -0.2707  | -0.1091   | 1.209    | 0.2986   |
| 1.873   | -1.975  | 3.071   | -0.3527  | 1.013     | 0.4391   | -0.6476  |
| 0.8353  | -1.349  | 3.88    | 0.4334   | 1.038     | -1.13    | -0.8257  |
| 1.034   | -2.129  | 4.353   | 0.3913   | 0.4804    | 0.2776   | -0.55    |
| 1.876   | -1.79   | 4.544   | -0.3872  | 0.2099    | 1.228    | 0.9685   |

|        |        |         |         |          |         |         |
|--------|--------|---------|---------|----------|---------|---------|
| 1.502  | -1.847 | 4.303   | -0.4946 | 0.191    | 0.6695  | 0.4962  |
| 1.098  | -1.139 | 3.764   | -0.0181 | 0.8057   | -0.2438 | -0.6657 |
| 1.524  | -2.512 | 3.55    | -0.2523 | 0.3248   | 0.844   | -0.3834 |
| -2.395 | -2.411 | -1.55   | -1.392  | -0.582   | 1.313   | -0.1739 |
| -2.196 | -2.713 | -1.419  | -0.7367 | -0.2175  | 1.566   | -0.3535 |
| -2.244 | -2.351 | -0.9756 | -1.207  | -0.5542  | 1.105   | -0.3362 |
| -2.076 | -2.256 | -0.8126 | -1.275  | -0.3986  | 1.275   | 0.1479  |
| -2.256 | -2.077 | -1.021  | -1.268  | -0.05443 | 1.031   | 0.2425  |
| -2.187 | -1.924 | -0.5968 | -1.15   | -0.1849  | 0.6769  | 0.01097 |
| -2.231 | -2.532 | -1.143  | -1.29   | -0.4351  | 0.9092  | -0.5241 |
| -2.747 | -2.267 | -1.223  | -1.215  | -0.7955  | 1.196   | -0.2139 |
| -2.15  | -2.126 | -0.8322 | -1.475  | -0.5571  | 1.401   | 0.5153  |

*Table continues below*

| PC8      | PC9      | PC10    | PC11     | PC12    | PC13      | PC14     |
|----------|----------|---------|----------|---------|-----------|----------|
| -0.07301 | -0.4367  | -0.2642 | 0.5096   | -0.2555 | 0.2562    | -0.1207  |
| 0.4684   | -0.2946  | 0.9281  | 0.2465   | 0.1711  | -0.07152  | 0.2705   |
| 0.2197   | 0.6154   | 0.664   | -0.2237  | 0.1142  | 0.4312    | 0.1739   |
| -0.3738  | 0.06452  | -0.6483 | 0.02645  | -0.5707 | 0.05456   | -0.08758 |
| 0.6337   | -0.08475 | 0.5282  | -0.09988 | 0.0341  | 0.1518    | 0.1372   |
| 0.3409   | -0.4098  | 0.3699  | -0.3363  | 0.4911  | -0.5861   | -0.2674  |
| 0.3255   | 0.2327   | 0.1438  | -0.2828  | 0.3803  | 0.02869   | -0.4312  |
| -0.6787  | 0.004656 | -0.6727 | 0.1896   | -0.4085 | 0.1274    | -0.2739  |
| -0.2165  | 0.3182   | 0.4933  | -0.1734  | 0.02717 | -0.5231   | -0.1307  |
| 0.4477   | -0.295   | -0.5926 | 1.182    | 0.4392  | -0.4422   | -0.531   |
| 0.5695   | -0.4013  | 0.4324  | -0.155   | 0.4581  | 0.3847    | 0.7249   |
| 0.9326   | -0.1025  | -0.2503 | -0.2865  | 0.4748  | -0.08516  | -0.5681  |
| 1.017    | -1.004   | 0.4319  | -0.4762  | -0.5125 | -0.7835   | 0.2143   |
| 0.8617   | -0.4408  | 0.01345 | 0.007577 | 0.327   | 0.00624   | -0.01169 |
| 0.05145  | -0.7453  | -0.2202 | 0.05212  | 0.3713  | 0.1716    | -0.1218  |
| -0.1097  | -0.754   | -0.2714 | 0.8172   | -0.1574 | -0.003711 | 0.09778  |
| 0.6882   | -0.4449  | -0.1205 | -0.3691  | 0.0535  | -0.4438   | -0.1269  |
| 0.3854   | -1.138   | 0.1975  | -0.0509  | 0.1944  | 0.05809   | -0.09903 |
| -1.206   | -0.1164  | 0.7606  | -0.4549  | -0.1955 | 0.3034    | 0.08448  |
| 0.4311   | 0.8988   | 0.4575  | 0.1391   | -0.423  | 0.4918    | 0.05052  |
| -1.217   | 0.7163   | 0.7552  | -0.05105 | -0.3965 | 0.6244    | 0.1927   |
| 0.3722   | 1.962    | -0.905  | 0.3445   | -0.2478 | -0.53     | -0.2329  |

|         |         |          |          |           |          |          |
|---------|---------|----------|----------|-----------|----------|----------|
| -0.3337 | 1.305   | 0.5085   | -0.4862  | -0.1186   | 0.04461  | 0.1125   |
| -0.6485 | 0.8228  | -0.2835  | -0.2462  | -0.008126 | -0.01625 | -0.04163 |
| -0.9812 | 0.08467 | -0.02406 | -0.1498  | -0.3934   | 0.1116   | -0.1707  |
| -1.217  | 0.03783 | 0.424    | -0.3104  | -0.7016   | 0.4604   | 0.2473   |
| -0.576  | 1.264   | -0.4327  | 0.3649   | 0.1878    | 0.1357   | 0.04321  |
| 0.7415  | 0.6805  | -0.7653  | -0.3167  | -0.2912   | -0.372   | 0.5157   |
| -0.1865 | -0.5104 | -0.7354  | -0.5572  | -0.4669   | -0.3996  | -0.2302  |
| -0.6279 | -0.5635 | 0.02822  | 0.37     | -0.08094  | 0.7174   | -0.784   |
| -0.1777 | -0.9915 | 0.2974   | 0.2148   | 0.09479   | -0.359   | 0.1238   |
| 0.2185  | -0.7286 | 0.6247   | 0.5719   | -0.5029   | 0.4269   | 0.01415  |
| 0.6638  | 1.463   | -0.2088  | 0.1851   | 0.6321    | 0.611    | 0.2399   |
| -0.1193 | 0.1127  | -1.58    | -0.4883  | 0.3723    | 0.1726   | 0.5328   |
| -0.5745 | -0.8697 | -0.4771  | -0.2462  | -0.3049   | -0.569   | 0.5185   |
| 0.451   | 0.1431  | 0.01044  | -0.1372  | -0.8924   | 0.08573  | -0.3046  |
| -0.312  | -0.6609 | -0.8451  | 0.06329  | 0.02078   | 0.5737   | 0.3888   |
| 0.272   | -0.595  | -0.02699 | 0.6693   | 0.4297    | 0.43     | 0.09076  |
| 0.9172  | 0.8938  | 0.2663   | -0.1265  | 0.1613    | -0.4794  | -0.1151  |
| -0.7268 | 0.4436  | 0.6528   | -0.5361  | 0.2123    | -0.4173  | -0.03364 |
| -1.051  | 0.2094  | 0.02632  | 0.6906   | 0.5858    | -0.2788  | 0.1446   |
| -0.2486 | 0.4419  | -0.2188  | 0.7842   | -0.3914   | -0.2832  | -0.1223  |
| 0.153   | 0.01983 | -0.4679  | 0.4359   | -0.2296   | 0.1131   | -0.04621 |
| 0.04484 | -0.5021 | 0.5869   | 0.01422  | 0.9529    | 0.3237   | 0.0602   |
| 0.7574  | 0.3232  | 0.3595   | -0.38    | 0.5556    | 0.3779   | -0.09137 |
| 0.1914  | 0.01145 | 0.5982   | 0.639    | -0.6525   | 0.3096   | -0.07231 |
| 0.949   | 0.8873  | -0.3265  | 0.01931  | 0.01972   | 0.4092   | 0.399    |
| -0.869  | 0.6697  | -0.6688  | -0.7709  | 0.4788    | -0.4068  | -0.2816  |
| -0.1376 | 0.6644  | 0.1587   | -0.02474 | 0.2314    | 0.02138  | 0.03686  |
| -0.7374 | 0.4914  | 0.4168   | -0.2779  | -0.2863   | 0.2054   | -0.412   |
| -0.9696 | -0.1981 | -0.4245  | -0.4469  | 0.4405    | -0.2     | 0.07189  |
| -0.3242 | 0.2615  | 0.9797   | 0.1689   | 0.2173    | -0.09438 | 0.02954  |
| 0.1751  | 0.8985  | -0.0304  | 0.3084   | -0.3171   | -0.2725  | 0.05203  |
| 0.3345  | 0.2004  | -0.4945  | 0.0444   | -0.1734   | 0.1309   | 0.4273   |
| -0.5238 | -0.5505 | -0.1726  | 0.8941   | 0.6578    | 0.3654   | 0.2188   |
| -0.7738 | -0.2249 | 0.4789   | -0.1428  | 0.2417    | -0.3157  | -0.2807  |
| -0.3479 | 0.2606  | 0.263    | 0.5051   | 0.3396    | -0.5073  | 0.2677   |
| 0.8257  | -0.1162 | 0.4079   | -0.5346  | 0.05974   | -0.1959  | -0.1726  |



|           |           |          |          |          |          |          |
|-----------|-----------|----------|----------|----------|----------|----------|
| 0.05583   | -0.3497   | 0.01016  | -0.2151  | 0.3916   | -0.08124 | 0.1568   |
| -0.07345  | -0.9207   | -0.5641  | -0.7399  | 0.4073   | -0.1322  | 0.06632  |
| -0.6835   | -0.02542  | 0.3653   | 0.4738   | 0.07724  | -0.7578  | 0.2425   |
| -0.4118   | 0.105     | 0.6054   | 0.829    | 0.1736   | -0.1665  | -0.2277  |
| -0.2449   | -0.01396  | 0.5207   | -0.03187 | 0.2499   | -0.2928  | -0.2735  |
| -0.4454   | -0.2941   | -0.1618  | 0.5006   | 0.005884 | -0.4344  | 0.01727  |
| -0.7852   | -0.09914  | -0.18    | -0.1639  | 0.6204   | 0.1921   | 0.03551  |
| -1.272    | -0.02707  | -0.43    | -0.2969  | 0.1844   | -0.2031  | 0.2089   |
| 0.8741    | 0.02499   | -0.5421  | 0.1964   | -0.2229  | 0.09388  | -0.1773  |
| 0.4707    | 0.05451   | -0.3569  | -0.5132  | 0.3398   | 0.7907   | -0.5985  |
| 0.6044    | 0.3139    | 0.3974   | 0.4572   | -0.5774  | -0.8192  | 0.2275   |
| 0.6254    | 0.4405    | -0.03393 | 0.1131   | -0.1112  | -0.03053 | 0.1451   |
| 1.087     | 0.5538    | 0.5602   | 0.1215   | 0.05588  | -0.09196 | 0.1202   |
| -0.4028   | -0.002958 | -0.06084 | -0.5936  | -0.09436 | 0.09563  | -0.1862  |
| 0.6074    | -0.4913   | -0.7547  | 0.2418   | -0.1097  | 0.1083   | 0.2458   |
| -0.3399   | -0.2302   | -0.9177  | 0.1368   | -0.2545  | 0.1173   | -0.2704  |
| 0.5124    | -0.1298   | 0.1778   | -0.208   | -0.1816  | 0.2586   | -0.1232  |
| -0.4814   | -0.4445   | 0.1823   | -0.3832  | -0.5009  | 0.105    | 0.1172   |
| -0.000576 | -0.9752   | -0.3093  | 0.08595  | -0.5074  | 0.1904   | 0.04467  |
| 0.2858    | -0.6398   | 0.3307   | -0.4579  | -0.6306  | -0.205   | 0.008531 |
| 0.6201    | -0.07855  | -0.05079 | -0.3739  | -0.2702  | 0.4525   | 0.2223   |
| 1.18      | -0.1194   | -0.1972  | -0.2567  | -0.2292  | 0.2107   | -0.3479  |
| 0.118     | -0.8736   | 0.2741   | -0.2418  | -0.2659  | 0.1197   | 0.0262   |
| PC15      | PC16      | PC17     | PC18     | PC19     | PC20     | PC21     |
| -0.08901  | -0.3909   | 0.1151   | -0.07955 | -0.03116 | -0.1228  | -0.06373 |
| -0.01418  | 0.4132    | 0.05759  | 0.1588   | -0.08937 | -0.1944  | 0.04602  |
| 0.3533    | 0.2374    | -0.4119  | 0.05118  | 0.1848   | 0.07995  | -0.0261  |
| -0.06858  | -0.3801   | -0.111   | 0.0477   | 0.07232  | 0.115    | 0.006195 |
| -0.3442   | -0.07544  | -0.0949  | -0.2023  | 0.09652  | 0.1655   | 0.05539  |
| -0.4015   | -0.104    | 0.2412   | -0.1882  | 0.00832  | 0.06566  | 0.1479   |
| -0.1837   | -0.3173   | 0.04666  | -0.0899  | -0.2093  | 0.06785  | 0.03186  |
| 0.6475    | 0.1455    | -0.1826  | 0.1946   | -0.1781  | 0.325    | -0.0108  |
| 0.3938    | 0.02108   | 0.0379   | -0.1264  | 0.1902   | -0.09867 | -0.01547 |
| -0.1452   | 0.02574   | -0.567   | -0.4155  | -0.04721 | -0.01461 | -0.3427  |
| 0.0135    | -0.04435  | 0.09204  | -0.04228 | 0.004947 | 0.1574   | -0.03373 |
| 0.07155   | -0.0608   | -0.0329  | -0.1196  | 0.35     | 0.02678  | 0.1792   |

|           |           |          |          |           |          |           |
|-----------|-----------|----------|----------|-----------|----------|-----------|
| -0.3441   | -0.2029   | -0.1642  | 0.2049   | 0.3234    | 0.2744   | -0.1748   |
| 0.2103    | 0.05286   | -0.4526  | 0.5472   | -0.3521   | -0.17    | 0.2886    |
| 0.5906    | 0.2       | 0.0503   | 0.04168  | -0.4123   | 0.01973  | 0.06937   |
| -0.2239   | -0.08943  | 0.3134   | 0.008389 | 0.1526    | 0.1383   | -0.03623  |
| -0.03003  | -0.1148   | 0.04532  | 0.2396   | -0.2667   | 0.09097  | -0.05734  |
| 0.4644    | -0.1038   | -0.1635  | -0.2367  | 0.2183    | -0.2191  | 0.1155    |
| -0.07664  | -0.008528 | -0.0651  | -0.1874  | 0.03351   | -0.2053  | -0.05467  |
| 0.07615   | 0.0412    | 0.5191   | 0.09946  | 0.01219   | -0.04048 | 0.008012  |
| 0.007557  | 0.1866    | 0.162    | -0.5256  | -0.1138   | 0.1446   | 0.0604    |
| 0.04399   | 0.09344   | 0.02454  | 0.3434   | 0.1578    | -0.1734  | 0.02168   |
| -0.02732  | 0.1423    | 0.4505   | 0.3079   | 0.1147    | 0.2471   | -0.09547  |
| -0.3926   | 0.3125    | 0.151    | -0.5727  | -0.1961   | -0.1443  | 0.01272   |
| -0.3204   | 0.1899    | -0.3491  | -0.0155  | 0.1787    | -0.2871  | -0.1029   |
| 0.1438    | -0.1575   | -0.2091  | 0.1616   | -0.2661   | -0.09873 | -0.1029   |
| -0.002867 | -0.07565  | 0.5261   | 0.1878   | 0.1921    | 0.1401   | 0.1556    |
| -0.2647   | 0.6035    | -0.2615  | -0.06022 | -0.05687  | -0.04925 | -0.001423 |
| -0.03896  | 0.8098    | 0.03998  | 0.05308  | 0.4288    | -0.07203 | 0.07307   |
| -0.3019   | -0.5598   | 0.08222  | 0.2979   | -0.09938  | 0.1297   | 0.01774   |
| 0.434     | 0.3333    | 0.1819   | -0.1538  | 0.08743   | 0.03939  | 0.07029   |
| -0.07615  | -0.2611   | 0.1077   | -0.01593 | 0.09034   | -0.09383 | -0.0568   |
| 0.01399   | 0.1169    | -0.5519  | 0.1389   | 0.02771   | 0.1222   | -0.0244   |
| -0.1078   | -0.04447  | 0.03606  | 0.03389  | -0.2052   | -0.1471  | -0.1868   |
| -0.08007  | -0.357    | 0.1179   | -0.2181  | -0.2362   | -0.04571 | 0.1358    |
| 0.09816   | -0.248    | -0.2043  | -0.1087  | 0.162     | 0.09663  | 0.003184  |
| -0.07535  | 0.02807   | 0.1287   | 0.4048   | 0.04093   | -0.1757  | -0.08393  |
| 0.154     | 0.3032    | 0.1717   | -0.04425 | 0.2004    | -0.02205 | 0.01307   |
| 0.009679  | -0.6339   | 0.2305   | -0.1479  | -0.1846   | -0.215   | -0.03705  |
| 0.3713    | -0.0836   | -0.2335  | -0.08821 | 0.01534   | 0.1064   | -0.01757  |
| -0.3386   | -0.177    | -0.2145  | -0.1483  | -0.04556  | 0.1292   | 0.1404    |
| 0.2441    | -0.0344   | -0.03577 | -0.114   | -0.08085  | 0.0572   | 0.1101    |
| 0.02065   | -0.09751  | 0.06329  | -0.1093  | 0.1907    | -0.1235  | 0.05755   |
| -0.04963  | 0.01045   | 0.3624   | 0.1556   | -0.1186   | -0.147   | -0.1621   |
| -0.1163   | 0.08865   | -0.1527  | 0.005171 | -0.0664   | 0.08113  | -0.01296  |
| -0.2937   | 0.2965    | 0.01774  | 0.1218   | -0.041    | -0.08786 | 0.06582   |
| -0.2289   | -0.3647   | -0.1277  | 0.01693  | 0.1172    | -0.04502 | 0.05549   |
| 0.09115   | 0.0146    | 0.1377   | 0.1033   | 0.0005425 | 0.07176  | -0.03084  |

|            |           |          |           |          |           |           |
|------------|-----------|----------|-----------|----------|-----------|-----------|
| 0.5071     | -0.1904   | -0.1299  | -0.07394  | 0.2029   | 0.04561   | -0.07713  |
| 0.2636     | 0.2288    | 0.02889  | 0.04249   | -0.1283  | -0.135    | -0.02432  |
| -0.1747    | 0.1081    | 0.2449   | -0.005784 | 0.004333 | -0.005285 | -0.06107  |
| -0.5684    | 0.1156    | -0.1649  | 0.02201   | 0.104    | 0.02299   | 0.08866   |
| -0.3668    | -0.005542 | 0.03421  | 0.05683   | -0.148   | 0.1033    | 0.02271   |
| 0.4092     | -0.4037   | 0.1429   | -0.2511   | 0.08813  | -0.1012   | 0.02494   |
| -0.09018   | 0.1345    | -0.06561 | 0.1363    | 0.127    | 0.1069    | 0.0801    |
| -0.2033    | 0.0789    | -0.03994 | 0.3417    | 6.91e-05 | -0.01034  | -0.1336   |
| 0.35       | -0.01214  | -0.04844 | -0.07398  | -0.0229  | -0.1204   | -0.00462  |
| -0.07539   | -0.1383   | 0.1433   | 0.1338    | -0.05425 | -0.1598   | -0.0294   |
| -0.0003466 | 0.003575  | 0.1137   | -0.1749   | 0.1129   | 0.06731   | -0.126    |
| -0.1358    | 0.004602  | 0.1804   | 0.1246    | -0.01304 | 0.01845   | 0.0444    |
| 0.4242     | -0.1128   | -0.06503 | 0.06254   | -0.05104 | -0.05522  | 0.0639    |
| -0.1066    | 0.1128    | 0.0347   | 0.209     | 0.06262  | -0.2071   | -0.07565  |
| 0.3839     | 0.06923   | 0.01485  | 0.03149   | -0.1411  | 0.1646    | -0.1348   |
| -0.328     | 0.2749    | -0.01769 | 0.06908   | -0.1096  | 0.1421    | -0.007173 |
| -0.1057    | 0.02894   | -0.04196 | -0.1916   | 0.05759  | 0.1278    | 0.02242   |
| -0.1879    | -0.4341   | -0.3431  | 0.1411    | 0.1636   | -0.1206   | 0.1101    |
| 0.08871    | 0.3088    | 0.3164   | -0.2612   | -0.1706  | 0.0417    | -0.04964  |
| 0.1883     | -0.005725 | 0.09259  | -0.06379  | 0.1351   | -0.08599  | -0.03079  |
| 0.1506     | -0.1479   | 0.2034   | 0.1719    | -0.05275 | -0.04138  | -0.03354  |
| 0.2248     | -0.0976   | 0.03585  | -0.009834 | -0.1447  | 0.1421    | -0.03062  |
| -0.2877    | 0.06507   | -0.01801 | -0.04435  | -0.05199 | -0.1071   | -0.04396  |
| 0.004411   | -0.3413   | -0.0314  | 0.03393   | 0.2152   | -0.1279   | 0.07976   |
| 0.325      | -0.08489  | 0.09651  | -0.0516   | 0.1441   | 0.07363   | -0.051    |
| -0.3302    | 0.1569    | -0.05986 | -0.06465  | -0.2624  | 0.04916   | 0.05851   |
| -0.3529    | 0.1854    | -0.1964  | -0.06276  | -0.1587  | 0.03637   | 0.1139    |
| 0.1345     | -0.06446  | -0.2466  | 0.000851  | -0.02571 | 0.04672   | -0.03479  |
| 0.06192    | 0.1496    | 0.08871  | 0.0329    | 0.1088   | 0.03769   | -0.03454  |
| -0.04095   | 0.119     | -0.04703 | -0.04257  | -0.2533  | 0.06859   | 0.04304   |
| 0.02167    | -0.1902   | -0.3168  | -0.1268   | -0.05514 | 0.0517    | 0.01131   |
| 0.09085    | 0.2777    | 0.1335   | -0.1795   | -0.1482  | -0.02884  | 0.003416  |
| -0.09118   | 0.1269    | 0.003111 | 0.1528    | 0.1105   | 0.06066   | 0.005165  |

**PCA loadings***Table continues below*

|             | PC1       | PC2      | PC3       | PC4      | PC5      | PC6        |
|-------------|-----------|----------|-----------|----------|----------|------------|
| <b>C</b>    | -0.1225   | 0.1802   | -0.02789  | 0.572    | -0.06354 | 0.153      |
| <b>EC</b>   | -0.1722   | -0.2174  | 0.2006    | 0.3945   | -0.0381  | 0.2851     |
| <b>EGC</b>  | -0.0992   | -0.3411  | 0.1276    | 0.08966  | -0.3458  | -0.1236    |
| <b>ECG</b>  | -0.06523  | 0.3303   | -0.1095   | 0.1039   | 0.3518   | 0.3855     |
| <b>EGCG</b> | -0.0861   | 0.01024  | 0.03225   | -0.2691  | -0.6305  | 0.4338     |
| <b>GA</b>   | 0.08276   | 0.3676   | -0.04787  | 0.09691  | -0.3891  | -0.0497    |
| <b>K</b>    | -0.2948   | -0.03944 | -0.239    | -0.1335  | 0.1446   | 0.07328    |
| <b>Ca</b>   | 0.279     | 0.2148   | 0.1233    | 0.1046   | -0.2552  | -0.1036    |
| <b>Mg</b>   | 0.02214   | 0.2608   | 0.367     | 0.07261  | 0.1823   | 0.1029     |
| <b>Na</b>   | -0.009291 | -0.337   | 0.2523    | 0.3345   | -0.02702 | 0.111      |
| <b>Fe</b>   | 0.352     | -0.06376 | -0.002897 | 0.08125  | 0.0157   | -0.0009811 |
| <b>Mn</b>   | 0.3647    | -0.04493 | -0.001845 | -0.01035 | -0.05789 | 0.07126    |
| <b>Cu</b>   | 0.2459    | 0.2577   | -0.1899   | 0.2374   | -0.06207 | 0.1352     |
| <b>Zn</b>   | -0.1477   | -0.0941  | -0.4649   | 0.02793  | -0.03017 | 0.3501     |
| <b>Pb</b>   | 0.3356    | -0.05005 | -0.2194   | 0.06675  | -0.01294 | -0.07085   |
| <b>Cd</b>   | 0.3145    | -0.01163 | -0.2916   | 0.08309  | 0.0297   | -0.07283   |
| <b>Ni</b>   | -0.07371  | -0.1924  | -0.2333   | 0.4279   | -0.01676 | -0.314     |
| <b>Cr</b>   | 0.2335    | -0.04888 | 0.4393    | -0.05398 | 0.2147   | 0.1375     |
| <b>TPC</b>  | -0.2028   | 0.3063   | 0.09774   | 0.0601   | -0.1431  | -0.3316    |
| <b>DPPH</b> | -0.2001   | 0.3104   | 0.1196    | 0.076    | -0.06573 | 0.01159    |
| <b>ABTS</b> | -0.2643   | 0.1293   | -0.006854 | 0.002457 | 0.03929  | -0.3435    |

*Table continues below*

|             | PC7      | PC8      | PC9      | PC10     | PC11      | PC12     |
|-------------|----------|----------|----------|----------|-----------|----------|
| <b>C</b>    | -0.2614  | 0.01861  | -0.2109  | 0.1018   | -0.04301  | 0.1451   |
| <b>EC</b>   | -0.07752 | -0.01537 | -0.1606  | 0.2669   | 0.4172    | -0.07096 |
| <b>EGC</b>  | -0.09184 | 0.06957  | -0.1666  | -0.479   | -0.4096   | 0.08276  |
| <b>ECG</b>  | 0.0189   | 0.01561  | 0.03028  | -0.07068 | -0.5795   | 0.2102   |
| <b>EGCG</b> | 0.2534   | 0.1778   | 0.1008   | 0.362    | -0.1373   | 0.2286   |
| <b>GA</b>   | -0.01315 | -0.03515 | -0.1355  | -0.08567 | 0.07963   | -0.1916  |
| <b>K</b>    | 0.2448   | 0.09521  | -0.4467  | 0.03868  | -0.07302  | -0.4699  |
| <b>Ca</b>   | 0.09222  | 0.07795  | 0.1738   | -0.2315  | -0.000938 | -0.3244  |
| <b>Mg</b>   | 0.5272   | 0.3362   | -0.01864 | -0.2003  | 0.1717    | -0.02493 |
| <b>Na</b>   | 0.07407  | 0.09227  | 0.1611   | -0.06976 | -0.2531   | -0.2763  |
| <b>Fe</b>   | -0.2114  | 0.1505   | -0.1312  | 0.03705  | 0.0185    | 0.247    |

|             |           |          |          |           |          |          |
|-------------|-----------|----------|----------|-----------|----------|----------|
| <b>Mn</b>   | -0.1528   | 0.1108   | -0.1115  | -0.001983 | -0.01682 | -0.1454  |
| <b>Cu</b>   | -0.004337 | 0.1253   | -0.08248 | -0.003911 | -0.04575 | -0.1902  |
| <b>Zn</b>   | -0.08587  | 0.2028   | 0.3378   | -0.5288   | 0.3854   | 0.09725  |
| <b>Pb</b>   | 0.01122   | -0.07694 | 0.1651   | 0.1799    | -0.07244 | -0.03633 |
| <b>Cd</b>   | 0.2209    | 0.09434  | -0.09755 | 0.1111    | 0.04522  | 0.1419   |
| <b>Ni</b>   | 0.5152    | -0.05419 | 0.2605   | 0.1302    | -0.0648  | 0.169    |
| <b>Cr</b>   | -0.004708 | 0.07559  | 0.1432   | -0.03426  | 0.08365  | 0.191    |
| <b>TPC</b>  | 0.06599   | -0.03327 | -0.2615  | -0.1759   | 0.1426   | 0.4177   |
| <b>DPPH</b> | -0.1076   | -0.4417  | 0.4438   | 0.04685   | -0.02398 | -0.1857  |
| <b>ABTS</b> | -0.3079   | 0.7165   | 0.2746   | 0.2618    | -0.07569 | -0.0877  |

*Table continues below*

|             | PC13     | PC14     | PC15      | PC16      | PC17      | PC18      |
|-------------|----------|----------|-----------|-----------|-----------|-----------|
| <b>C</b>    | -0.4978  | 0.2953   | -0.01989  | 0.002446  | 0.1933    | -0.259    |
| <b>EC</b>   | 0.5425   | 0.012    | 0.1397    | 0.07777   | -0.04616  | 0.1062    |
| <b>EGC</b>  | 0.2018   | 0.1478   | 0.4153    | -0.1319   | -0.002578 | -0.1124   |
| <b>ECG</b>  | 0.3547   | -0.03675 | -0.09486  | 0.02369   | 0.01429   | 0.1416    |
| <b>EGCG</b> | -0.1085  | -0.04927 | 0.03444   | 0.07668   | 0.03549   | -0.00485  |
| <b>GA</b>   | 0.2276   | -0.1173  | -0.2795   | -0.6241   | 0.1449    | 0.09083   |
| <b>K</b>    | -0.1688  | -0.254   | 0.2392    | -0.05486  | 0.3079    | -0.007512 |
| <b>Ca</b>   | 0.003448 | 0.1751   | -0.08237  | 0.3261    | 0.003688  | 0.008235  |
| <b>Mg</b>   | -0.06997 | 0.2823   | 0.2295    | -0.006642 | 0.04278   | 0.1697    |
| <b>Na</b>   | -0.1318  | -0.4398  | -0.3205   | 0.1845    | 0.02819   | 0.05555   |
| <b>Fe</b>   | -0.2533  | -0.2115  | 0.272     | -0.1428   | -0.02364  | 0.6605    |
| <b>Mn</b>   | -0.03211 | -0.1454  | 0.03667   | 0.1545    | 0.05949   | 0.02855   |
| <b>Cu</b>   | 0.04323  | -0.1873  | 0.1129    | 0.04606   | -0.3506   | -0.1655   |
| <b>Zn</b>   | -0.0409  | -0.1051  | 0.0004101 | 0.005573  | 0.121     | 0.001402  |
| <b>Pb</b>   | 0.2412   | 0.1578   | 0.1518    | 0.1812    | 0.714     | 0.01654   |
| <b>Cd</b>   | 0.106    | -0.1644  | 0.2684    | 0.04308   | -0.2613   | -0.4103   |
| <b>Ni</b>   | -0.05308 | -0.0389  | -0.04774  | -0.2357   | -0.01742  | 0.1184    |
| <b>Cr</b>   | -0.03    | -0.3037  | 0.04804   | -0.3564   | 0.2819    | -0.4451   |
| <b>TPC</b>  | 0.09758  | -0.437   | -0.06046  | 0.4141    | 0.1988    | -0.001979 |
| <b>DPPH</b> | -0.1065  | -0.2336  | 0.5497    | -0.01277  | -0.03683  | 0.04157   |
| <b>ABTS</b> | 0.1193   | -0.04281 | 0.0795    | -0.04321  | 0.01657   | -0.04151  |
|             | PC19     | PC20     | PC21      |           |           |           |
| <b>C</b>    | -0.04701 | -0.08516 | -0.03717  |           |           |           |
| <b>EC</b>   | 0.1239   | -0.1123  | -0.02736  |           |           |           |
| <b>EGC</b>  | 0.01303  | 0.06506  | -0.00411  |           |           |           |

|      |          |           |          |
|------|----------|-----------|----------|
| ECG  | 0.0739   | -0.1814   | -0.09797 |
| EGCG | 0.05058  | 0.00443   | 0.00146  |
| GA   | -0.2322  | -0.07448  | -0.01983 |
| K    | 0.2067   | -0.1509   | 0.02553  |
| Ca   | 0.4325   | -0.4821   | 0.08442  |
| Mg   | -0.295   | 0.169     | -0.05111 |
| Na   | -0.3652  | 0.0007018 | 0.1666   |
| Fe   | 0.08083  | -0.1646   | 0.2104   |
| Mn   | -0.02782 | 0.1237    | -0.848   |
| Cu   | 0.2599   | 0.6007    | 0.2594   |
| Zn   | -0.01152 | -0.02222  | -0.02562 |
| Pb   | -0.1419  | 0.2097    | 0.2043   |
| Cd   | -0.3969  | -0.4387   | 0.04771  |
| Ni   | 0.3058   | 0.05551   | -0.2492  |
| Cr   | 0.3289   | -0.04249  | 0.03531  |
| TPC  | 0.02707  | 0.07662   | -0.01014 |
| DPPH | -0.1219  | -0.04231  | -0.1005  |
| ABTS | -0.01532 | -0.03106  | -0.02899 |

Figure S2. Statistical significance of each parameter, separately.

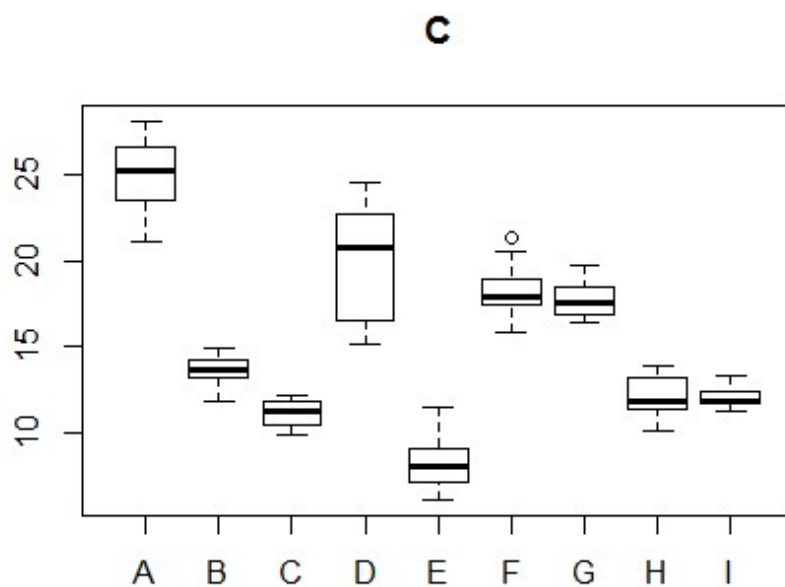

### EC

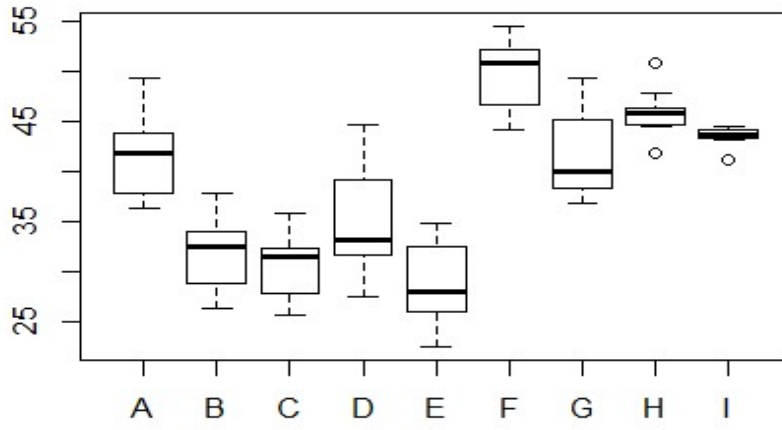

### EGC

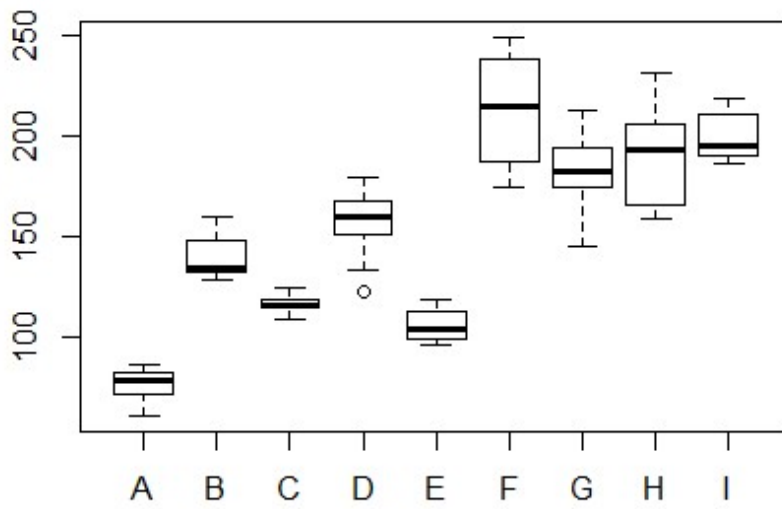

### ECG

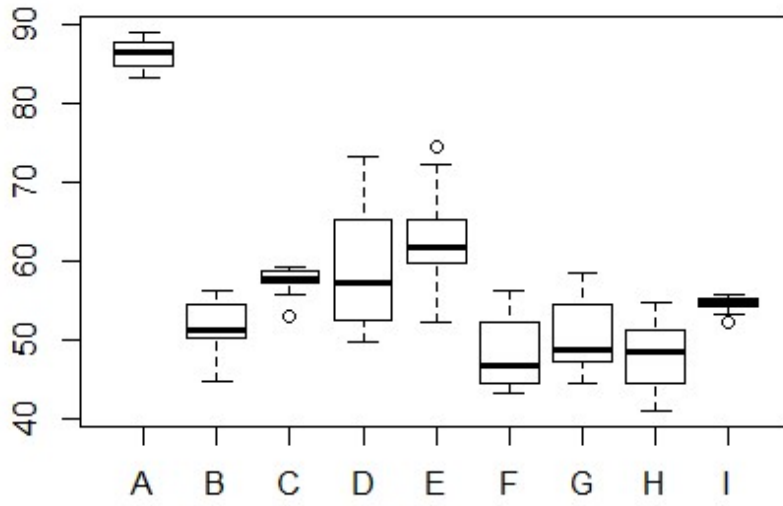

### EGCG

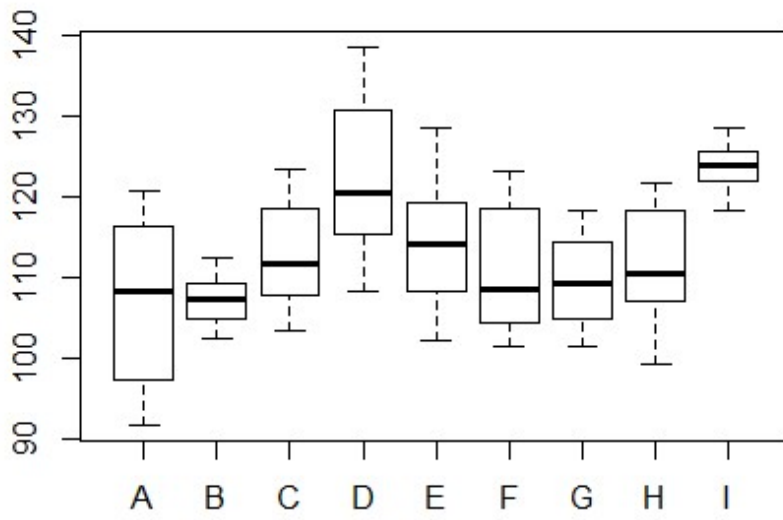



### GA

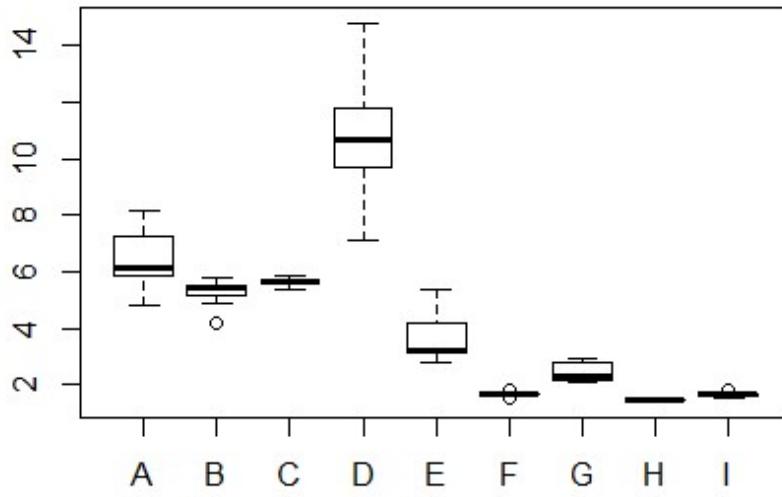

### K

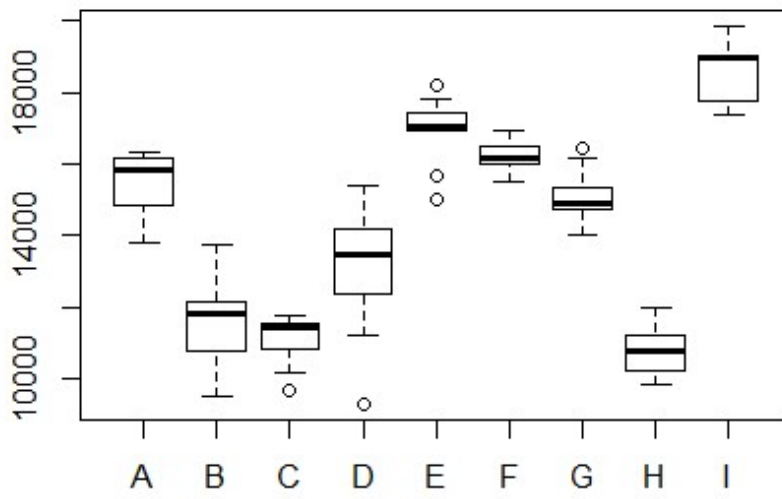

### Ca

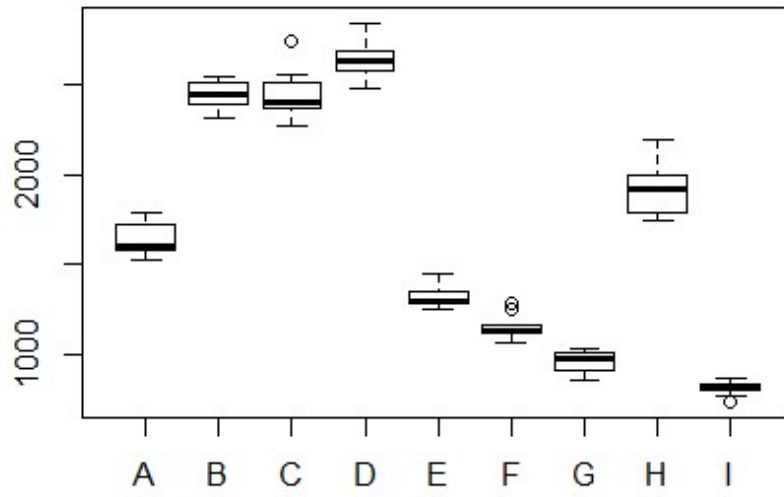

### Mg

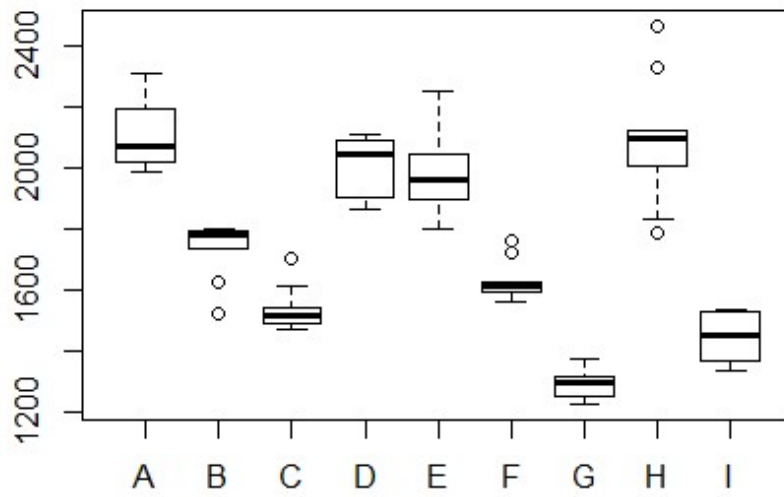

### Na

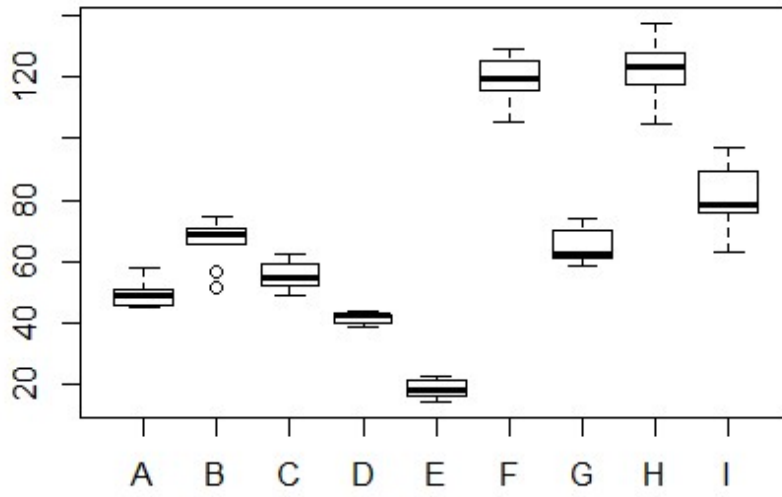

### Fe

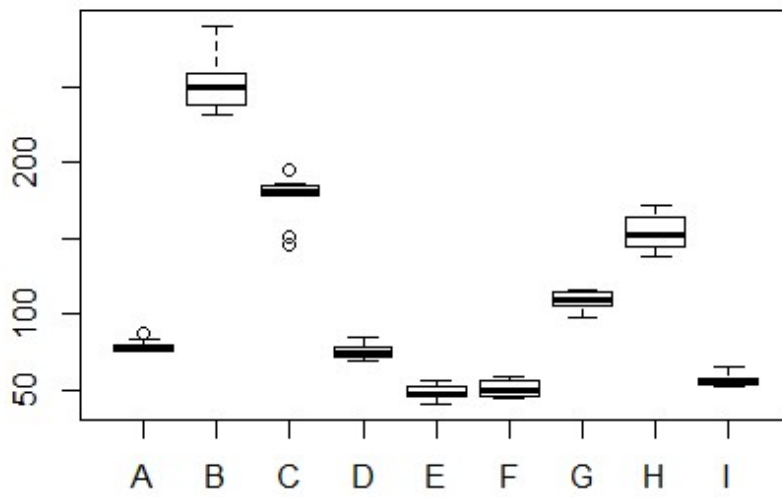

### Mn

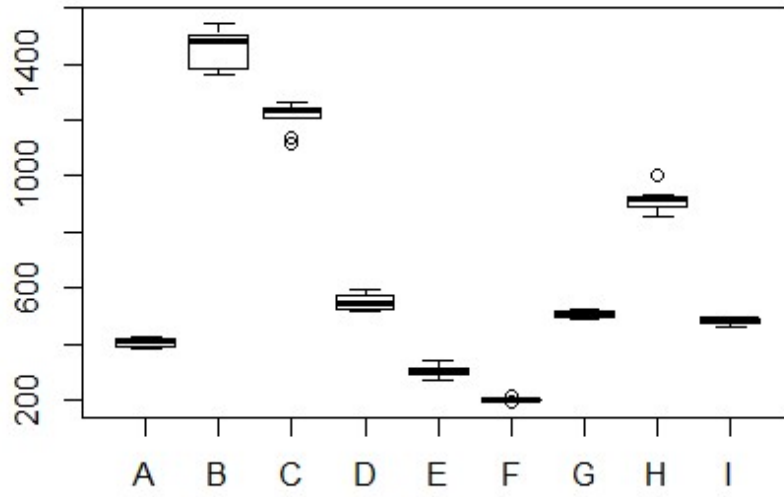

### Cu

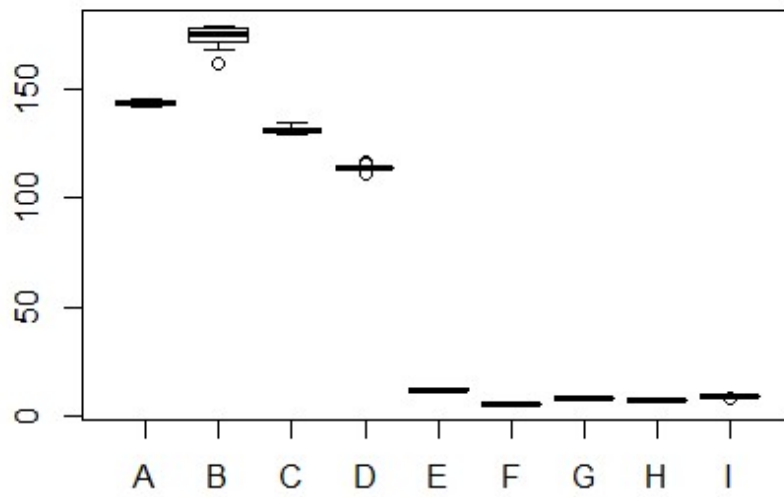

### Zn

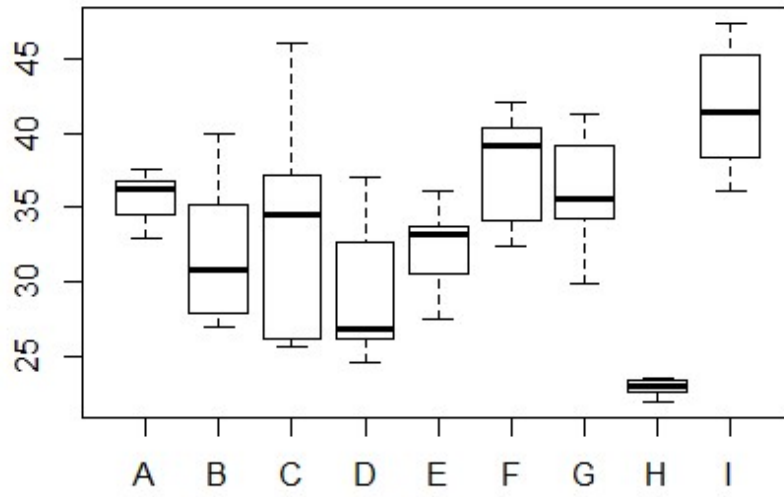

### Pb

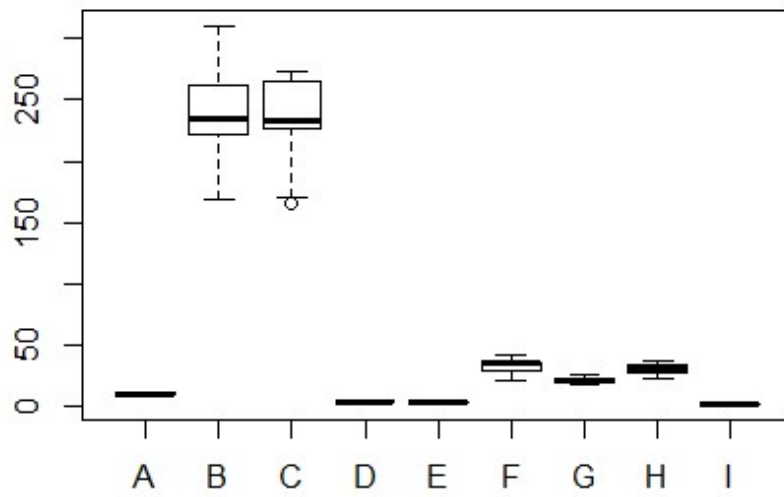

### Cd

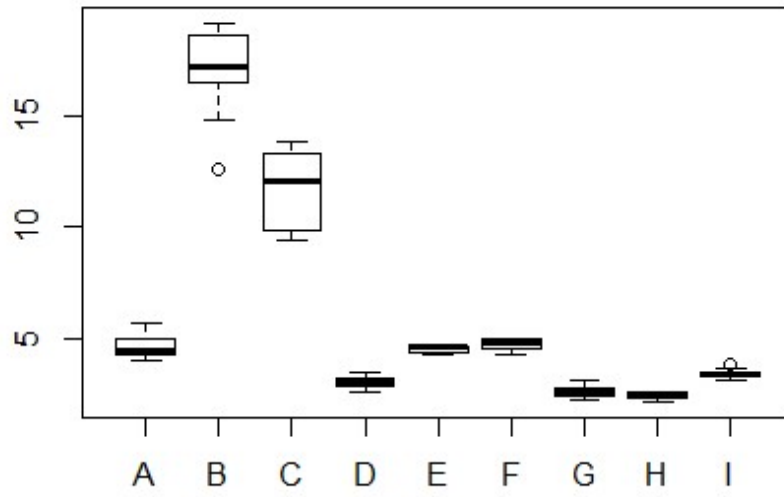

### Ni

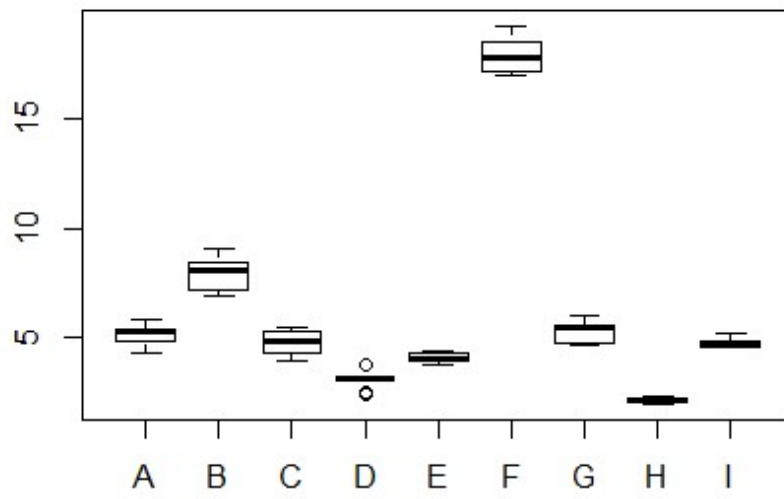

### Cr

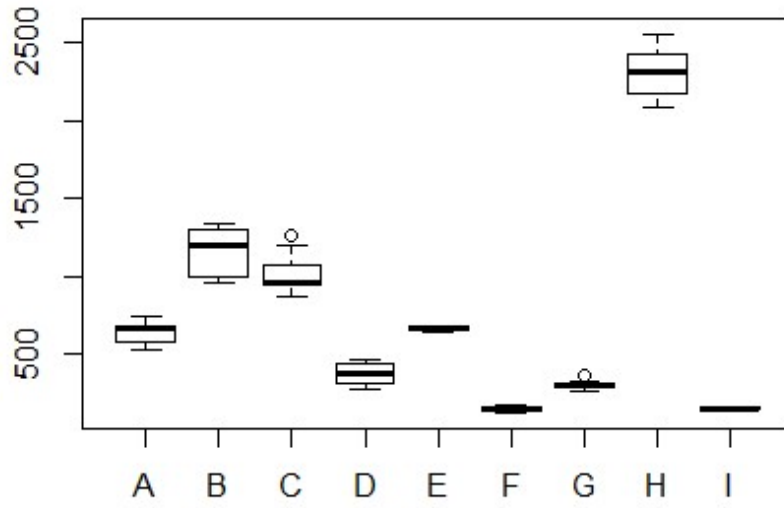

### TPC

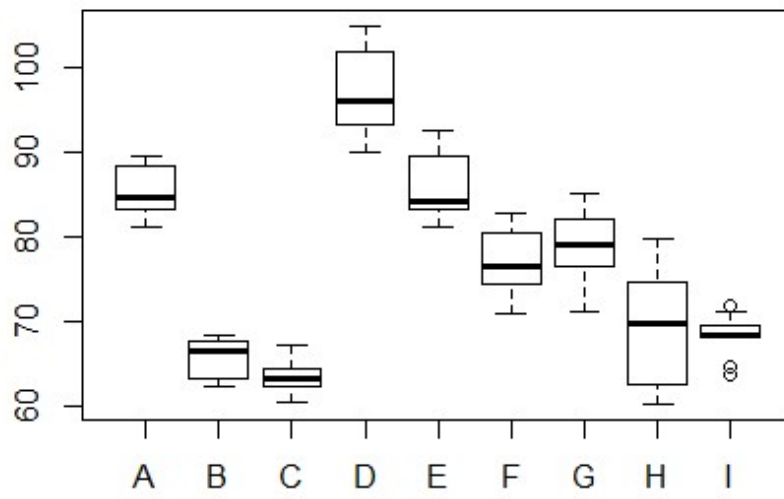

### DPPH

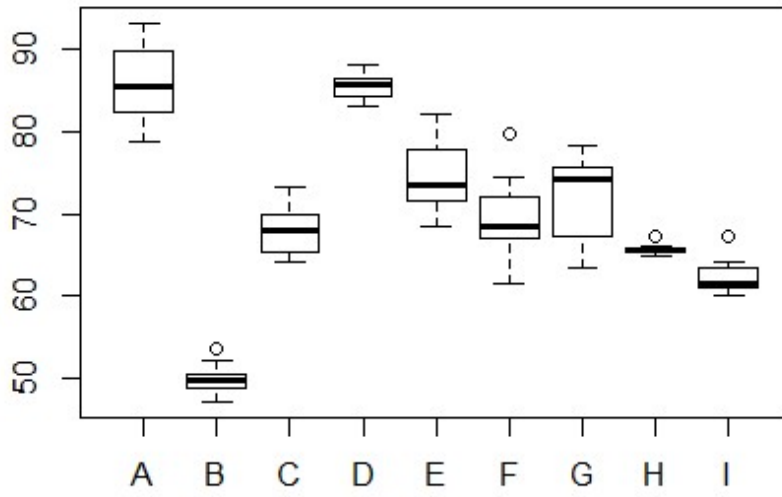

### ABTS

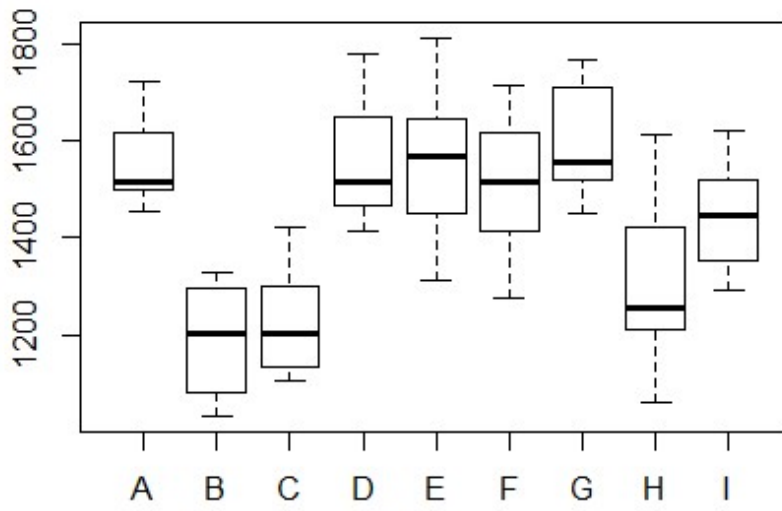

Supplement: molecules-23-01689-s001.pdf [file molecules-23-01689-s001.pdf]
